# Supplementary material
Source: Research Square preprint supplement (doi:10.21203/rs.3.rs-10249098/v1)
Supplement: Supplementary file 1 [file 31522747712221c91017e6c6.docx]

**Engineering Paediatric Formulations: A Systematic Review of Process Systems Methods, Sectoral Gaps, and the PPES Framework**

**Josephine Adu1 and Gabriel Osei Forkuo2, ***

1Kwame Nkrumah University of Science and Technology, Kumasi, Ghana; https://orcid.org/0009-0004-4298-9264 (J.A.)

2Department of Forest Engineering, Forest Management Planning and Terrestrial Measurements, Transilvania University of Brasov, Brasov, Romania; https://orcid.org/0000-0001-8478-8066 (G.O.F).

*** Corresponding author:** gabriel.forkuo@unitbv.ro

**Supplementary Material**

**Full Search Strategy: 110 Structured Search Strings Across 13 Thematic Blocks**

The systematic search combined population, product, methodological, and outcome terms across five automated bibliographic platforms (OpenAlex, CrossRef, Semantic Scholar, EconBiz/EconLit, and IDEAS/RePEC). A total of 110 structured queries, organised into 13 thematic blocks, were used to comprehensively capture the literature on Process Systems Engineering (PSE) applications in paediatric consumer goods formulation. Searches were restricted to the period 2000–2026. Each query is identified by a unique code (PS·01–PS·110) that corresponds to the query identifiers used in the accompanying search script.

**Block 1: PSE Core Methods — Broad (PS·01–PS·10)**

| **Query ID** | **Search String** |
| --- | --- |
| **PS·01** | process systems engineering formulation design optimisation |
| **PS·02** | quality by design QbD pharmaceutical formulation |
| **PS·03** | process analytical technology PAT drug formulation manufacturing |
| **PS·04** | digital twin formulation pharmaceutical manufacturing |
| **PS·05** | process modelling simulation consumer goods formulation |
| **PS·06** | process optimisation formulation design product quality |
| **PS·07** | process intensification formulation manufacturing scale-up |
| **PS·08** | multiscale modelling formulation drug product development |
| **PS·09** | mechanistic modelling pharmaceutical formulation process |
| **PS·10** | computational formulation design optimisation product development |

**Block 2: PSE × Paediatric Pharmaceuticals (PS·11–PS·22)**

| **Query ID** | **Search String** |
| --- | --- |
| **PS·11** | paediatric formulation process systems engineering optimisation |
| **PS·12** | pediatric drug formulation quality by design QbD |
| **PS·13** | paediatric formulation process analytical technology PAT |
| **PS·14** | child-friendly dosage forms process modelling design |
| **PS·15** | paediatric oral formulation computational design optimisation |
| **PS·16** | orodispersible tablets paediatric formulation design |
| **PS·17** | mini-tablets paediatric formulation process optimisation |
| **PS·18** | liquid formulation paediatric process modelling stability |
| **PS·19** | paediatric excipient safety suitability formulation design |
| **PS·20** | paediatric pharmaceutical manufacturing QbD PAT scale-up |
| **PS·21** | digital twin paediatric drug product development |
| **PS·22** | paediatric dosage form design regulatory EMA FDA guidelines |

**Block 3: PSE × Paediatric Nutrition & Food Products (PS·23–PS·33)**

| **Query ID** | **Search String** |
| --- | --- |
| **PS·23** | infant formula process modelling optimisation quality |
| **PS·24** | paediatric nutrition food formulation process systems engineering |
| **PS·25** | baby food formulation process optimisation quality safety |
| **PS·26** | fortified food paediatric process modelling digital twin |
| **PS·27** | infant formula manufacturing quality by design |
| **PS·28** | paediatric food product computational formulation design |
| **PS·29** | infant formula spray drying process optimisation |
| **PS·30** | paediatric nutraceutical formulation process modelling |
| **PS·31** | children food product stability safety formulation |
| **PS·32** | infant weaning food formulation process intensification |
| **PS·33** | paediatric functional food formulation design optimisation |

**Block 4: PSE × Paediatric Cosmetics & Skincare (PS·34–PS·42)**

| **Query ID** | **Search String** |
| --- | --- |
| **PS·34** | paediatric skincare formulation process optimisation design |
| **PS·35** | baby lotion cosmetic formulation computational design |
| **PS·36** | infant skincare safety formulation process modelling |
| **PS·37** | paediatric cosmetic formulation quality safety regulatory |
| **PS·38** | children topical formulation process systems engineering |
| **PS·39** | paediatric cosmetic excipient safety computational assessment |
| **PS·40** | baby sunscreen formulation process optimisation stability |
| **PS·41** | infant skin barrier topical formulation design |
| **PS·42** | paediatric cosmetic safety-by-design risk assessment formulation |

**Block 5: PSE × Paediatric Hygiene Products (PS·43–PS·49)**

| **Query ID** | **Search String** |
| --- | --- |
| **PS·43** | paediatric hygiene product formulation process modelling |
| **PS·44** | baby hygiene product safety formulation design |
| **PS·45** | children hygiene formulation process optimisation quality |
| **PS·46** | paediatric oral hygiene toothpaste formulation design |
| **PS·47** | infant hygiene product excipient safety assessment |
| **PS·48** | nappy diaper rash product formulation process optimisation |
| **PS·49** | paediatric hygiene product safety-by-design regulatory |

**Block 6: Safety-by-Design & Risk Assessment (PS·50–PS·59)**

| **Query ID** | **Search String** |
| --- | --- |
| **PS·50** | safety by design paediatric formulation risk assessment |
| **PS·51** | paediatric excipient safety toxicity formulation |
| **PS·52** | risk assessment children consumer product formulation |
| **PS·53** | biocompatibility paediatric formulation computational assessment |
| **PS·54** | paediatric drug safety excipient dose formulation optimisation |
| **PS·55** | acceptable daily intake paediatric excipient safety formulation |
| **PS·56** | regulatory risk assessment paediatric consumer goods formulation |
| **PS·57** | safety-by-design computational toxicology paediatric formulation |
| **PS·58** | paediatric pharmaceutical excipient database safety assessment |
| **PS·59** | children product ingredient safety risk modelling |

**Block 7: Regulatory Frameworks & Compliance (PS·60–PS·67)**

| **Query ID** | **Search String** |
| --- | --- |
| **PS·60** | EMA paediatric regulation formulation development guidelines |
| **PS·61** | FDA paediatric drug formulation regulatory guidelines QbD |
| **PS·62** | ICH Q8 Q9 Q10 paediatric formulation development |
| **PS·63** | paediatric regulation EMA PUMA PDCO formulation development |
| **PS·64** | regulatory compliance paediatric food cosmetic formulation |
| **PS·65** | GMP manufacturing paediatric pharmaceutical formulation quality |
| **PS·66** | paediatric investigation plan PIP formulation development EMA |
| **PS·67** | paediatric drug development regulatory challenge formulation |

**Block 8: Machine Learning & AI in Formulation Design (PS·68–PS·76)**

| **Query ID** | **Search String** |
| --- | --- |
| **PS·68** | machine learning paediatric formulation design prediction |
| **PS·69** | artificial intelligence drug formulation optimisation prediction |
| **PS·70** | deep learning formulation process optimisation quality |
| **PS·71** | neural network pharmaceutical formulation design prediction |
| **PS·72** | machine learning excipient selection formulation design |
| **PS·73** | AI-driven formulation optimisation consumer goods |
| **PS·74** | data-driven formulation design pharmaceutical process |
| **PS·75** | predictive modelling formulation stability quality |
| **PS·76** | machine learning sensory acceptability paediatric product |

**Block 9: Sensory Acceptability & Patient-Centric Design (PS·77–PS·84)**

| **Query ID** | **Search String** |
| --- | --- |
| **PS·77** | paediatric sensory acceptability oral formulation taste masking |
| **PS·78** | taste masking paediatric formulation process optimisation |
| **PS·79** | palatability paediatric oral drug formulation design |
| **PS·80** | patient-centric paediatric formulation design development |
| **PS·81** | sensory evaluation children food product formulation |
| **PS·82** | organoleptic properties paediatric formulation process |
| **PS·83** | texture acceptability paediatric food cosmetic formulation |
| **PS·84** | mouthfeel viscosity paediatric oral liquid formulation |

**Block 10: Process Intensification & Scale-Up (PS·85–PS·91)**

| **Query ID** | **Search String** |
| --- | --- |
| **PS·85** | process intensification pharmaceutical formulation scale-up |
| **PS·86** | continuous manufacturing pharmaceutical formulation QbD |
| **PS·87** | spray drying microencapsulation paediatric formulation |
| **PS·88** | hot melt extrusion paediatric formulation process optimisation |
| **PS·89** | granulation paediatric formulation process modelling |
| **PS·90** | process scale-up paediatric pharmaceutical formulation |
| **PS·91** | nano formulation paediatric drug delivery process design |

**Block 11: Quality & Stability (PS·92–PS·98)**

| **Query ID** | **Search String** |
| --- | --- |
| **PS·92** | formulation stability paediatric pharmaceutical prediction modelling |
| **PS·93** | shelf life prediction paediatric food formulation modelling |
| **PS·94** | accelerated stability testing formulation computational prediction |
| **PS·95** | product quality attributes paediatric formulation QbD |
| **PS·96** | critical quality attributes CQA paediatric formulation process |
| **PS·97** | design space paediatric formulation QbD optimisation |
| **PS·98** | robust formulation design paediatric product quality |

**Block 12: Systematic Reviews & Meta-Analyses (PS·99–PS·104)**

| **Query ID** | **Search String** |
| --- | --- |
| **PS·99** | systematic review paediatric formulation development challenges |
| **PS·100** | review process systems engineering pharmaceutical formulation |
| **PS·101** | meta-analysis QbD quality by design formulation outcomes |
| **PS·102** | scoping review paediatric consumer goods formulation design |
| **PS·103** | literature review PSE process modelling formulation |
| **PS·104** | bibliometric analysis paediatric pharmaceutical formulation |

**Block 13: Emerging & Cross-Cutting Topics (PS·105–PS·110)**

| **Query ID** | **Search String** |
| --- | --- |
| **PS·105** | 3D printing paediatric formulation personalised dosing |
| **PS·106** | personalised medicine paediatric formulation computational |
| **PS·107** | green formulation sustainable paediatric consumer goods process |
| **PS·108** | microbiome paediatric consumer goods formulation safety |
| **PS·109** | nanoparticle paediatric drug formulation safety design |
| **PS·110** | excipient innovation paediatric formulation process development |
